# Supplementary material
Source: HighWire-hosted journal article supplement (https://erj.ersjournals.com/content/59/6/2102577)

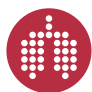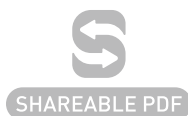

# Dupilumab efficacy and safety in patients with asthma and blood eosinophils $\geq 500 \text{ cells} \cdot \mu\text{L}^{-1}$

Klaus F. Rabe<sup>1,2</sup>, Ian D. Pavord<sup>3</sup>, Mario Castro<sup>4</sup>, Michael E. Wechsler<sup>5</sup>, Nadia Daizadeh<sup>6</sup>, Upender Kapoor<sup>7</sup>, Benjamin Ortiz<sup>8</sup>, Amr Radwan<sup>8</sup>, Robert R. Johnson<sup>7</sup>, Paul J. Rowe<sup>7</sup>, Yamo Deniz<sup>8</sup> and Juby A. Jacob-Nara<sup>7</sup>

<sup>1</sup>LungenClinic Grosshansdorf, member of the German Center for Lung Research (DZL), Airway Research Center North (ARCN), Grosshansdorf, Germany. <sup>2</sup>Christian-Albrechts University, member of the German Center for Lung Research (DZL), Airway Research Center North (ARCN), Kiel, Germany. <sup>3</sup>NIHR Oxford Biomedical Research Centre, University of Oxford, Oxford, UK. <sup>4</sup>Division of Pulmonary, Critical Care, and Sleep Medicine, University of Kansas School of Medicine, Kansas City, KS, USA. <sup>5</sup>Division of Pulmonary, Critical Care and Sleep Medicine, National Jewish Health, Denver, CO, USA. <sup>6</sup>Sanofi, Cambridge, MA, USA. <sup>7</sup>Sanofi, Bridgewater, NJ, USA. <sup>8</sup>Regeneron Pharmaceuticals, Inc., Tarrytown, NY, USA.

Corresponding author: Klaus F. Rabe (k.f.rabe@lungenclinic.de)

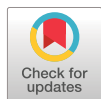

Shareable abstract (@ERSpublications)

**Dupilumab is well tolerated and improves clinical outcomes in patients with asthma and high eosinophils ( $\geq 500 \text{ cells} \cdot \mu\text{L}^{-1}$ ). Improvements in clinical outcomes correlate with eosinophil counts, demonstrating dupilumab efficacy in those with high eosinophils.** <https://bit.ly/3Jxvicb>

**Cite this article as:** Rabe KF, Pavord ID, Castro M, *et al.* Dupilumab efficacy and safety in patients with asthma and blood eosinophils  $\geq 500 \text{ cells} \cdot \mu\text{L}^{-1}$ . *Eur Respir J* 2022; 59: 2102577 [DOI: 10.1183/13993003.02577-2021].

This single-page version can be shared freely online.

Copyright ©The authors 2022.

This version is distributed under the terms of the Creative Commons Attribution Non-Commercial Licence 4.0. For commercial reproduction rights and permissions contact [permissions@ersnet.org](mailto:permissions@ersnet.org)

Received: 27 Sept 2021  
Accepted: 17 March 2022

*To the Editor:*

Uncontrolled, moderate-to-severe asthma in patients with high baseline blood eosinophils ( $\geq 500 \text{ cells} \cdot \mu\text{L}^{-1}$ ) can be difficult to treat [1]. Global Initiative for Asthma guidelines recommend biologics as add-on therapy for patients with severe type 2 inflammatory asthma that remains uncontrolled despite treatment with high-dose inhaled corticosteroids [2]. Surrogate markers of type 2 inflammation, such as elevated levels of blood or sputum eosinophils and fractional exhaled nitric oxide ( $F_{\text{eNO}}$ ) can be used to identify patients with a type 2 signature who might be eligible for such treatment [1–3]. Several biologics are now available that target different molecules in type 2 inflammatory pathways, notably IgE and type 2 cytokines [1–3]. One of these, dupilumab, is a fully human VelocImmune-derived [4, 5] monoclonal antibody that blocks the shared receptor component for interleukin-4 and -13, cytokines that are key and central drivers of type 2 inflammation in multiple diseases, thus inhibiting their signalling [6, 7].

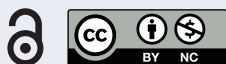

Supplement: inline-supplementary-material-1 [file inline-supplementary-material-1.pdf]
